# Supplementary material for: Development of an AAV-Based MicroRNA Gene Therapy to Treat Machado-Joseph Disease
Source: PubMed Central journal article supplement — Mol Ther Methods Clin Dev. 2019 Oct 28;15:343–58. doi: 10.1016/j.omtm.2019.10.008 (PMC6889651; doi:10.1016/j.omtm.2019.10.008), 2019-10-28
Supplement: mmc1.pdf [file mmc1.pdf]

**OMTM, Volume 15**

## **Supplemental Information**

### **Development of an AAV-Based MicroRNA Gene**

#### **Therapy to Treat Machado-Joseph Disease**

**Raygene Martier, Marina Sogorb-Gonzalez, Janice Stricker-Shaver, Jeannette Hübener-Schmid, Sonay Keskin, Jiri Klima, Lodewijk J. Toonen, Stefan Juhas, Jana Juhasova, Zdenka Ellederova, Jan Motlik, Eva Haas, Sander van Deventer, Pavlina Konstantinova, Huu Phuc Nguyen, and Melvin M. Evers**

## Supplemental material

| Groups | Treatment       | Route of injection | Number of animals (n) | Amount of injection ( $\mu$ l) |
|--------|-----------------|--------------------|-----------------------|--------------------------------|
| 1      | AAV5-miATXN3_7  | ICV                | 3                     | 10                             |
| 2      |                 | Cisterna magna     | 3                     | 10                             |
| 3      |                 | Bilateral DCN      | 3                     | 4 = 2+2                        |
| 4      | AAV5-miATXN3_9  | ICV                | 3                     | 10                             |
| 5      |                 | Cisterna magna     | 3                     | 10                             |
| 6      |                 | Bilateral DCN      | 3                     | 4 = 2+2                        |
| 7      | AAV5-miATXN3_11 | ICV                | 3                     | 10                             |
| 8      |                 | Cisterna magna     | 3                     | 10                             |
| 9      |                 | Bilateral DCN      | 3                     | 4 = 2+2                        |
| 10     | AAV5-GFP        | Bilateral DCN      | 3                     | 4 = 2+2                        |
| 11     | No treatment    | Not applicable     | 3                     | 0                              |

Table S1. Treatment group design of the *in vivo* investigations. AAV5-miATXN3\_7, -9 and -11 were tested *in vivo* and delivered to the SCA3 knock-in mice by 3 different routes of administration.

| Treatment  | Transcript (Blast) | % coverage (Blast) | Fold Change (treatment vs PBS) | p-value (treatment vs PBS) |
|------------|--------------------|--------------------|--------------------------------|----------------------------|
| miATXN3_7  | ATXN3              | 100%               | -1.2                           | 9.4E-03                    |
| miATXN3_7  | GNPTAB             | 63%                | 1.1                            | 4.2E-03                    |
| miATXN3_7  | SOX5               | 63%                | -1.1                           | 2.6E-02                    |
| miATXN3_7  | GNPTAB             | 63%                | 1.1                            | 4.2E-03                    |
| miATXN3_7  | CTSC               | 63%                | 1.3                            | 2.2E-16                    |
| miATXN3_9  | ATXN3              | 100%               | -1.5                           | 3.4E-16                    |
| miATXN3_9  | TNFRSF6B           | 59%                | 1.3                            | 4.4E-02                    |
| miATXN3_9  | FGD6               | 59%                | -1.2                           | 9.1E-03                    |
| miATXN3_11 | ATXN3              | 100%               | -1.3                           | 1.0E-06                    |
| miATXN3_11 | ICA1               | 68%                | 1.3                            | 4.8E-03                    |
| miATXN3_11 | CACNA1D            | 63%                | 1.5                            | 2.9E-02                    |

Table S2. Prediction of off-target genes based on BLAST search and RNA sequencing. BLAST search was performed with the guide sequences of miATXN3\_7, miATXN3\_9 and miATXN3\_11. The blast results were then compared to RNA sequencing expression values obtained from human-derived frontal brain-like neurons treated with the AAV5-miATXN3 candidates or the formulation buffer. P-values >0.05 were excluded

| Gene name | TPOTS value | 8mer | 7mer-M8 | 7mer-1A | 6mer | Fold Change (mi7 vs PBS) | p-value (mi7 vs PBS) |
|-----------|-------------|------|---------|---------|------|--------------------------|----------------------|
| WDR72     | 0.816       | 1    | 1       | 9       | 1    | -1.4                     | 9.5E-03              |
| SCAI      | 0.615       | 1    | 0       | 7       | 0    | -1.3                     | 3.4E-05              |
| GDA       | 0.547       | 3    | 0       | 1       | 2    | -2.3                     | 6.9E-03              |
| FOXP2     | 0.526       | 2    | 2       | 1       | 1    | -1.3                     | 2.9E-02              |
| DNAL1     | 0.525       | 0    | 1       | 7       | 0    | -1.3                     | 1.5E-02              |
| AAK1      | 0.522       | 2    | 0       | 3       | 7    | 1.1                      | 3.3E-02              |
| KCNMA1    | 0.488       | 1    | 0       | 5       | 3    | 1.3                      | 1.8E-03              |
| ONECUT2   | 0.487       | 1    | 0       | 5       | 2    | -1.2                     | 6.9E-04              |
| FBXL20    | 0.428       | 1    | 1       | 3       | 3    | -1.2                     | 3.6E-03              |
| IKZF2     | 0.426       | 1    | 1       | 3       | 1    | -1.4                     | 3.2E-02              |
| BMPR1B    | 0.426       | 1    | 1       | 3       | 1    | -1.3                     | 1.6E-04              |
| CSRNP3    | 0.403       | 0    | 2       | 4       | 3    | -1.3                     | 1.4E-02              |
| LIFR      | 0.367       | 1    | 2       | 1       | 2    | -1.4                     | 1.5E-03              |
| ZNF652    | 0.36        | 1    | 1       | 2       | 0    | -1.1                     | 3.1E-03              |
| LONRF2    | 0.36        | 1    | 0       | 3       | 5    | 1.2                      | 8.9E-05              |
| CPNE3     | 0.36        | 1    | 1       | 2       | 0    | -1.2                     | 7.7E-03              |
| PHF6      | 0.357       | 1    | 0       | 3       | 2    | -1.2                     | 1.3E-02              |
| C21orf91  | 0.357       | 1    | 0       | 3       | 2    | -1.2                     | 1.2E-02              |
| TMEM47    | 0.356       | 1    | 0       | 3       | 1    | -1.3                     | 1.3E-02              |
| ARL3      | 0.355       | 1    | 0       | 3       | 0    | -1.1                     | 2.0E-03              |
| ATXN3     | 0.295       | 1    | 1       | 1       | 0    | -1.2                     | 9.4E-03              |

Table S3. Prediction of off-target genes in human by siSPOTR and RNA sequencing after AAV5-miATXN3\_7 treatment. A search was performed on siSPOTR with the seed sequence of miATXN3\_7 to check for binding within 3'UTR of human transcripts. The top 20 genes with highest tPOTS were

compared to RNA sequencing expression values in human-derived frontal brain-like neurons. RNA sequencing was performed on RNA isolated from human-derived frontal brain-like neurons treated with AAV5-miATXN3\_7 or the formulation buffer for 7 days. The genes with p-value < 0.05 were excluded.

| Gene name      | TPOTS value | 8mer | 7mer-M8 | 7mer-1A | 6mer | Fold Change (mi9 vs PBS) | p-value (mi9 vs PBS) |
|----------------|-------------|------|---------|---------|------|--------------------------|----------------------|
| <i>PHC3</i>    | 0.651       | 2    | 1       | 4       | 1    | -1.3                     | 1.2E-03              |
| <i>HIF3A</i>   | 0.617       | 3    | 1       | 1       | 2    | -1.4                     | 3.1E-02              |
| <i>ONECUT2</i> | 0.606       | 0    | 3       | 6       | 6    | -1.2                     | 3.4E-13              |
| <i>UBE2R2</i>  | 0.515       | 2    | 0       | 3       | 0    | -1.1                     | 1.5E-04              |
| <i>H6PD</i>    | 0.493       | 1    | 1       | 4       | 3    | -1.2                     | 6.0E-16              |
| <i>RAB3B</i>   | 0.43        | 1    | 1       | 3       | 5    | -1.3                     | 6.3E-10              |
| <i>PTGS1</i>   | 0.427       | 1    | 1       | 3       | 2    | -3.4                     | 1.3E-121             |
| <i>KSR2</i>    | 0.412       | 0    | 4       | 2       | 2    | 1.4                      | 2.1E-04              |
| <i>TTC14</i>   | 0.391       | 2    | 1       | 0       | 1    | -1.1                     | 1.9E-05              |
| <i>BBX</i>     | 0.391       | 2    | 1       | 0       | 1    | -1.2                     | 3.2E-04              |
| <i>ZNF286B</i> | 0.385       | 2    | 0       | 1       | 0    | -1.2                     | 3.4E-03              |
| <i>SYT2</i>    | 0.385       | 2    | 0       | 1       | 0    | -1.2                     | 2.2E-05              |
| <i>SYP</i>     | 0.385       | 2    | 0       | 1       | 0    | 1.3                      | 0.0E+00              |
| <i>THY1</i>    | 0.365       | 1    | 2       | 1       | 0    | 1.3                      | 7.2E-03              |
| <i>TFDP2</i>   | 0.365       | 1    | 2       | 1       | 0    | -1.4                     | 1.3E-17              |
| <i>PRLR</i>    | 0.357       | 1    | 0       | 3       | 2    | -1.2                     | 8.0E-03              |
| <i>FMN1</i>    | 0.328       | 0    | 0       | 5       | 3    | 2.1                      | 2.6E-05              |
| <i>PRX</i>     | 0.326       | 0    | 0       | 5       | 1    | -1.2                     | 1.1E-02              |
| <i>NCALD</i>   | 0.326       | 0    | 0       | 5       | 1    | -1.1                     | 1.9E-05              |
| <i>ATXN3</i>   | 0.001       | 0    | 0       | 0       | 1    | -1.5                     | 3.4E-16              |

Table S4. Prediction of off-target genes in human by siSPOTR and RNA sequencing for AAV5-miATXN3\_9 treatment. Performed as described in table S3 for AAV5-miATXN3\_9.

| Gene name      | TPOTS value | 8mer | 7mer-M8 | 7mer-1A | 6mer | Fold Change (mi11 vs PBS) | p-value (mi11 vs PBS) |
|----------------|-------------|------|---------|---------|------|---------------------------|-----------------------|
| <i>SPTY2D1</i> | 0.615       | 3    | 1       | 1       | 0    | -1.1                      | 9.3E-05               |
| <i>ENAH</i>    | 0.586       | 2    | 1       | 3       | 1    | 1.2                       | 3.0E-08               |
| <i>TDRD6</i>   | 0.55        | 3    | 1       | 0       | 0    | -1.6                      | 2.8E-02               |
| <i>PRKAB2</i>  | 0.546       | 3    | 0       | 1       | 1    | 1.1                       | 9.2E-05               |
| <i>TAB3</i>    | 0.525       | 2    | 2       | 1       | 0    | -1.2                      | 5.4E-04               |
| <i>C1orf21</i> | 0.518       | 2    | 0       | 3       | 3    | -1.3                      | 4.7E-57               |
| <i>SMAD2</i>   | 0.517       | 2    | 0       | 3       | 2    | -1.1                      | 2.4E-03               |
| <i>BRWD1</i>   | 0.515       | 2    | 0       | 3       | 0    | -1.1                      | 4.0E-17               |
| <i>EXD2</i>    | 0.498       | 1    | 2       | 3       | 3    | -1.2                      | 4.1E-05               |
| <i>NFYA</i>    | 0.497       | 1    | 2       | 3       | 2    | -1.3                      | 1.0E-35               |
| <i>AAK1</i>    | 0.484       | 0    | 5       | 2       | 4    | 1.2                       | 8.7E-06               |
| <i>RRAGD</i>   | 0.456       | 2    | 1       | 1       | 1    | -1.2                      | 6.7E-03               |
| <i>RBM43</i>   | 0.455       | 2    | 1       | 1       | 0    | -1.4                      | 2.3E-07               |
| <i>ATRNL1</i>  | 0.455       | 2    | 1       | 1       | 0    | -1.1                      | 8.8E-04               |
| <i>ZFH3</i>    | 0.451       | 2    | 0       | 2       | 1    | 1.1                       | 1.5E-02               |
| <i>LYSMD3</i>  | 0.451       | 2    | 0       | 2       | 1    | -1.2                      | 3.6E-02               |

|                 |       |   |   |   |   |      |          |
|-----------------|-------|---|---|---|---|------|----------|
| <b>LOX</b>      | 0.451 | 2 | 0 | 2 | 1 | 1.8  | 1.6E-12  |
| <b>LPP</b>      | 0.446 | 1 | 4 | 0 | 6 | 1.2  | 1.1E-02  |
| <b>PAPOLG</b>   | 0.432 | 1 | 2 | 2 | 2 | -1.1 | 2.9E-02  |
| <b>C21orf91</b> | 0.426 | 1 | 1 | 3 | 1 | -1.2 | 4.9E-02  |
| <b>ATXN3</b>    | 0     | 0 | 0 | 0 | 0 | -1.3 | 9.96E-07 |

Table S5. Prediction of off-target genes in human by siSPOTR and RNA sequencing for AAV5-miATXN3\_11 treatment. Performed as described in table S3 for AAV5-miATXN3\_11.

| <b>Gene name</b>     | <b>TPOTS value</b> | <b>8mer</b> | <b>7mer-M8</b> | <b>7mer-1A</b> | <b>6mer</b> | <b>Fold Change (mi9 vs untreated)</b> | <b>p-value (mi9 vs untreated)</b> |
|----------------------|--------------------|-------------|----------------|----------------|-------------|---------------------------------------|-----------------------------------|
| <i>Ncl</i>           | 0.657              | 2           | 2              | 3              | 2           | 1.3                                   | 8.3E-03                           |
| <i>Aak1</i>          | 0.51               | 1           | 4              | 1              | 5           | -1.6                                  | 5.0E-05                           |
| <i>Onecut2</i>       | 0.497              | 1           | 2              | 3              | 2           | -1.2                                  | 1.3E-03                           |
| <i>Nhs12</i>         | 0.461              | 0           | 1              | 6              | 1           | -1.5                                  | 1.5E-04                           |
| <i>Cacna1e</i>       | 0.458              | 2           | 1              | 1              | 3           | -1.0                                  | 5.0E-05                           |
| <i>Nav1</i>          | 0.435              | 1           | 2              | 2              | 5           | -1.4                                  | 5.0E-05                           |
| <i>Ttc14</i>         | 0.422              | 1           | 0              | 4              | 2           | -1.6                                  | 5.0E-05                           |
| <i>Fzd3</i>          | 0.408              | 0           | 3              | 3              | 3           | -1.3                                  | 5.0E-05                           |
| <i>Srgap3</i>        | 0.396              | 0           | 1              | 5              | 1           | -0.8                                  | 3.0E-04                           |
| <i>Pde5a</i>         | 0.391              | 2           | 1              | 0              | 1           | -1.0                                  | 2.0E-03                           |
| <i>Lonrf2</i>        | 0.385              | 2           | 0              | 1              | 0           | -1.3                                  | 5.0E-05                           |
| <i>Zfp704</i>        | 0.37               | 1           | 2              | 1              | 5           | -1.1                                  | 5.0E-05                           |
| <i>Mecp2</i>         | 0.368              | 1           | 2              | 1              | 3           | -1.5                                  | 5.0E-05                           |
| <i>Cldn12</i>        | 0.362              | 1           | 1              | 2              | 2           | -1.3                                  | 5.0E-05                           |
| <i>Dnajc18</i>       | 0.361              | 1           | 1              | 2              | 1           | -0.6                                  | 1.2E-02                           |
| <i>0610030E20Rik</i> | 0.361              | 1           | 1              | 2              | 1           | -1.2                                  | 2.0E-04                           |
| <i>Dhx33</i>         | 0.36               | 1           | 1              | 2              | 0           | -0.7                                  | 5.8E-03                           |
| <i>Pdzd2</i>         | 0.356              | 1           | 0              | 3              | 1           | -1.2                                  | 5.0E-05                           |
| <i>D430041D05Rik</i> | 0.355              | 1           | 0              | 3              | 0           | -1.4                                  | 5.0E-05                           |
| <i>Atxn3</i>         | 0.16               | 1           | 0              | 0              | 0           | -1.7                                  | 5.0E-05                           |

Table S6. Prediction of off-target genes in mice by siSPOTR and RNA sequencing for AAV5-miATXN3\_9 treatment. Performed as described in table S3. siSPOTR search was performed against mouse transcripts. RNA sequencing was performed on RNA isolated from brain stem of SCA3 knock-in mice treated with AAV5-miATXN3\_9 or control (untreated) by injection in the cisterna magna.

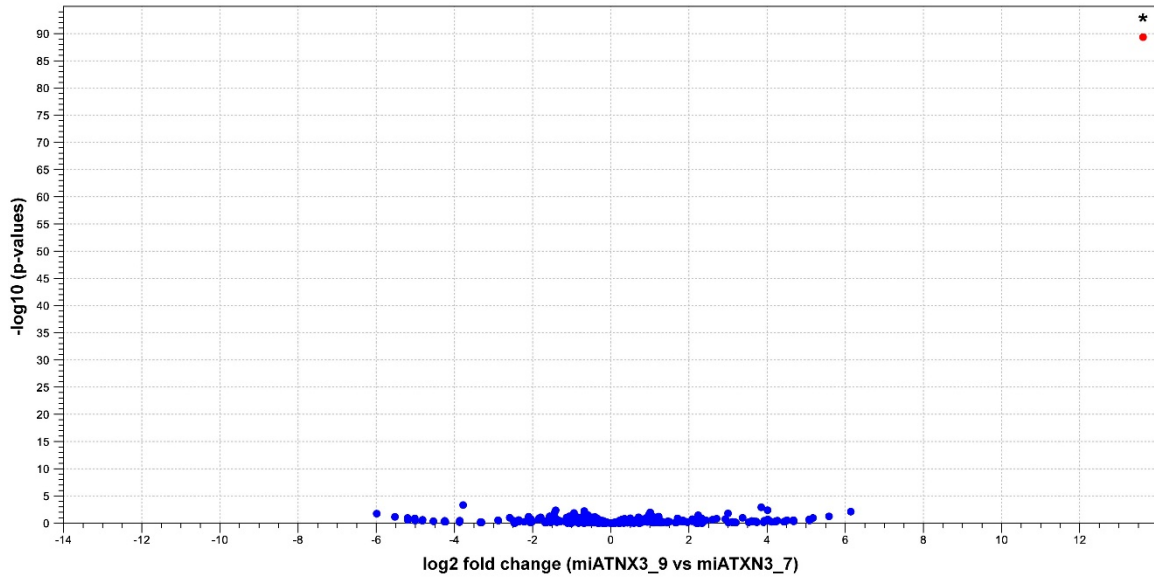

**Figure S1: Volcano plot of miRNA expression levels between miATXN3\_09 vs miATXN3\_07 transduced neurons.** IPSC-derived neurons were treated with AAV5-miATXN3 candidates, after which small RNA sequencing was performed. Differential expression analysis on miRNAs revealed miATXN3\_9 as the only significantly altered miRNA, whereas endogenous miRNAs were at comparable levels. \* = FDR <0.05. n = 2 per treatment condition, total of 787 individual miRNAs per sample.
